# Supplementary material
Source: publisher figshare collection journal article supplement (https://acs.figshare.com/ndownloader/files/4562395)
Supplement: Supplementary file 1 [file 4562395]

# Molecular Dynamics of Variegated Polyamide Dendrimers

Benjamin P. Roberts,<sup>1</sup> Guy Y. Krippner,<sup>2</sup> Martin J. Scanlon<sup>1</sup> and David K. Chalmers<sup>1</sup>

1. Medicinal Chemistry and Drug Action, Monash Institute of Pharmaceutical Sciences. 381 Royal Parade, Parkville, Victoria 3052, Australia.
2. Verva Pharmaceuticals Ltd. PO Box 1069, Grovedale, Victoria 3216, Australia.

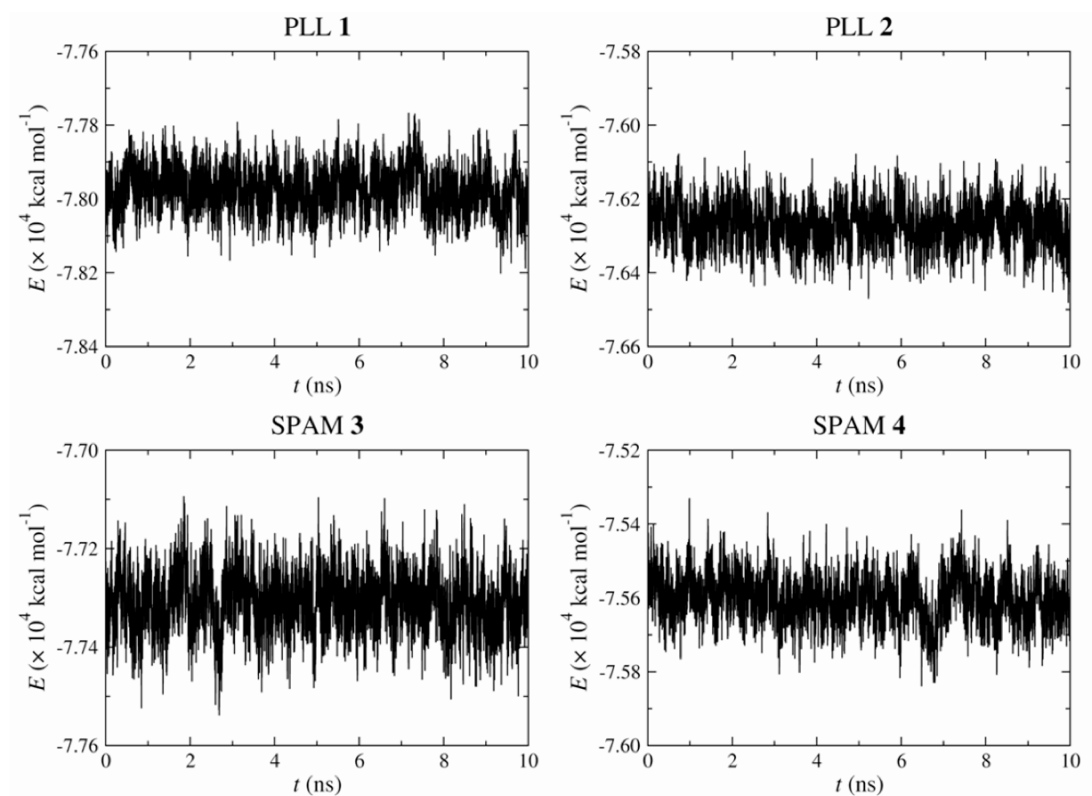

Figure S1: Simulation energies of the dendrimers **1-4** (conformer 3) during production molecular dynamics. Energies shown are the “TOTAL3” energy computed by NAMD, a sum of potential and kinetic energy with reduced short-time fluctuations.

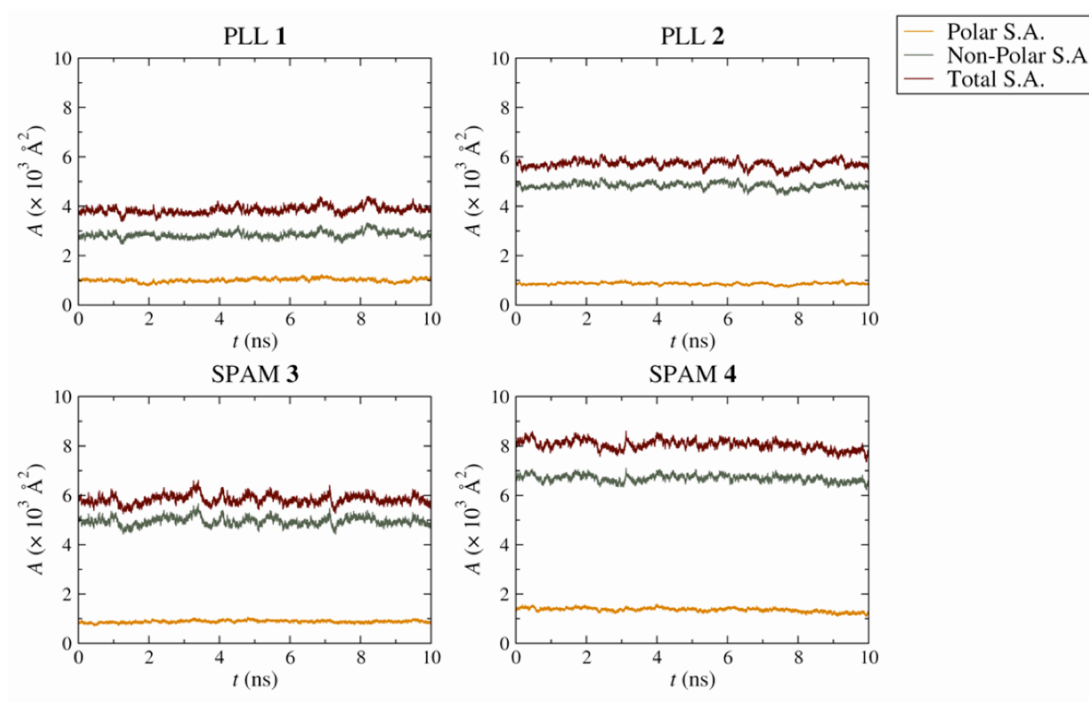

Figure S2: Solvent-accessible surface areas of the dendrimers **1-4** (conformer 3) during production molecular dynamics. Polar surface areas are contributed by polar heavy atoms (i.e., nitrogen, oxygen); non-polar surface areas are contributed by carbon atoms.

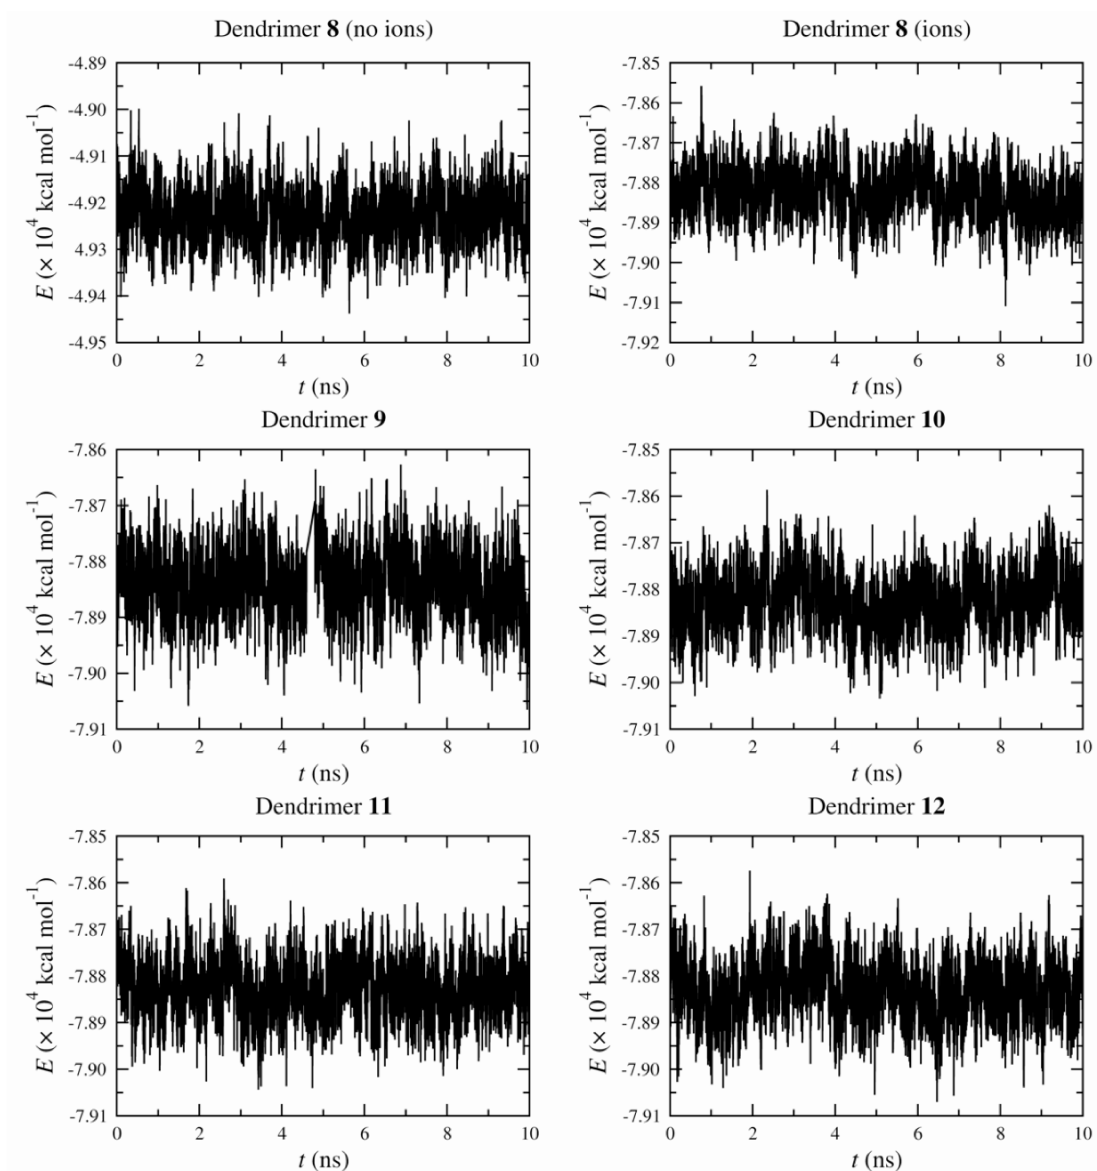

Figure S3: Instantaneous total simulation energies (NAMD TOTAL3) for the variegated SPAM dendrimers **8** – **12**, capped with ammonium and carboxylate groups. **8** is variegated with pattern I, **9** with pattern II, and so on.

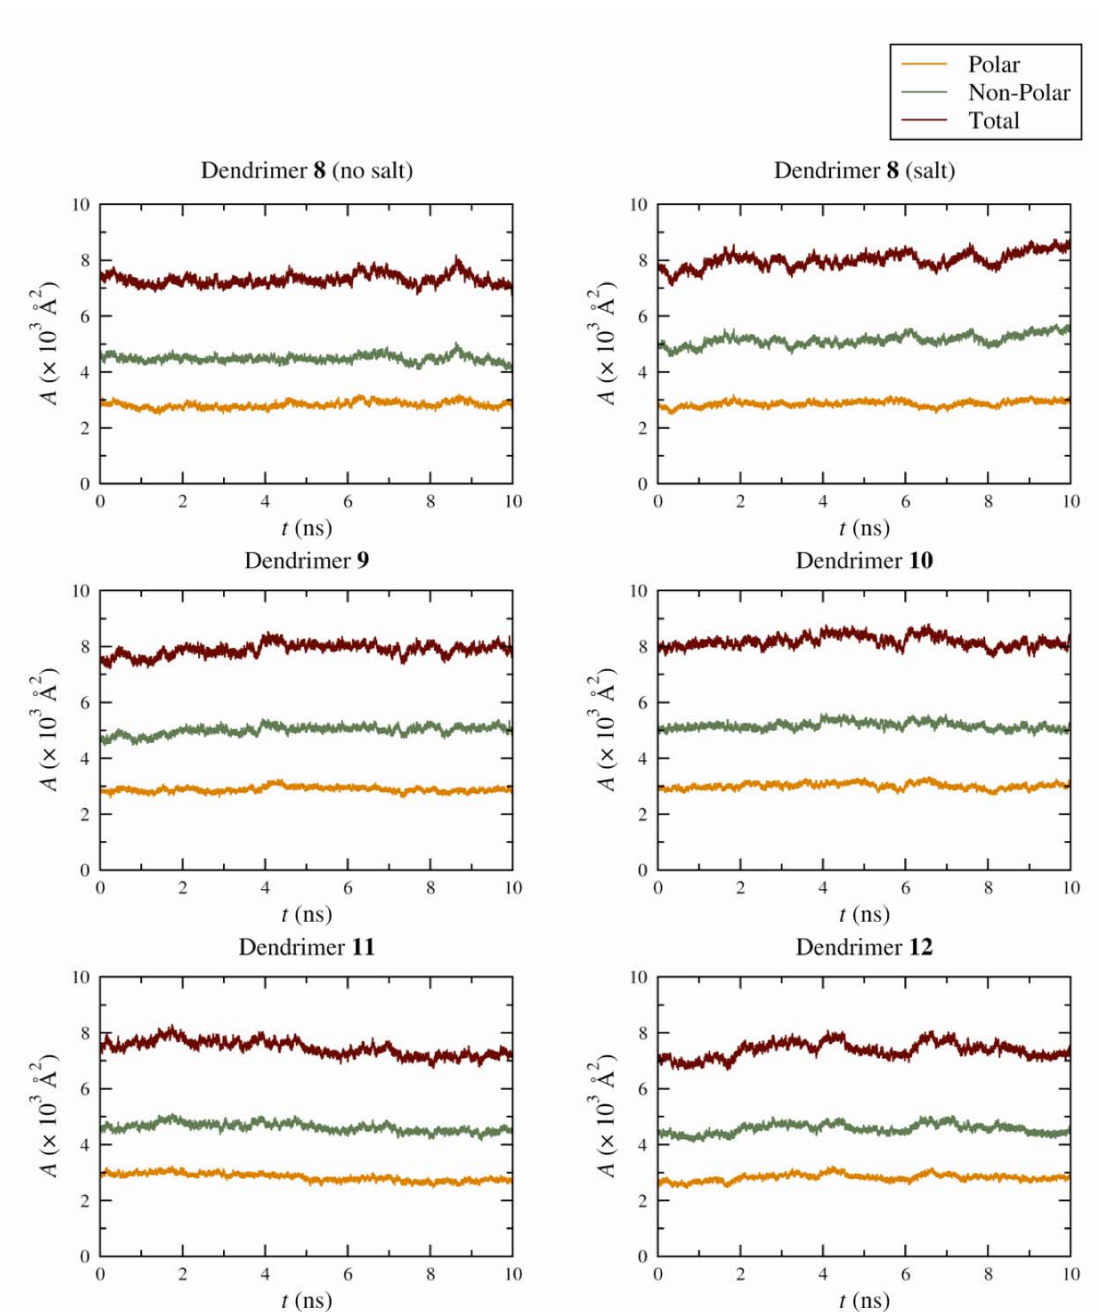

Figure S4: Instantaneous solvent-accessible surface areas for the variegated SPAM dendrimers **8** – **12**, capped with ammonium and carboxylate groups. **8** is variegated with pattern I, **9** with pattern II, and so on. Surface areas for polar and non-polar atoms, and the total solvent-accessible surface area, are shown for each dendrimer. Polar surface areas are contributed by polar heavy atoms (i.e., nitrogen, oxygen); non-polar surface areas are contributed by carbon atoms.

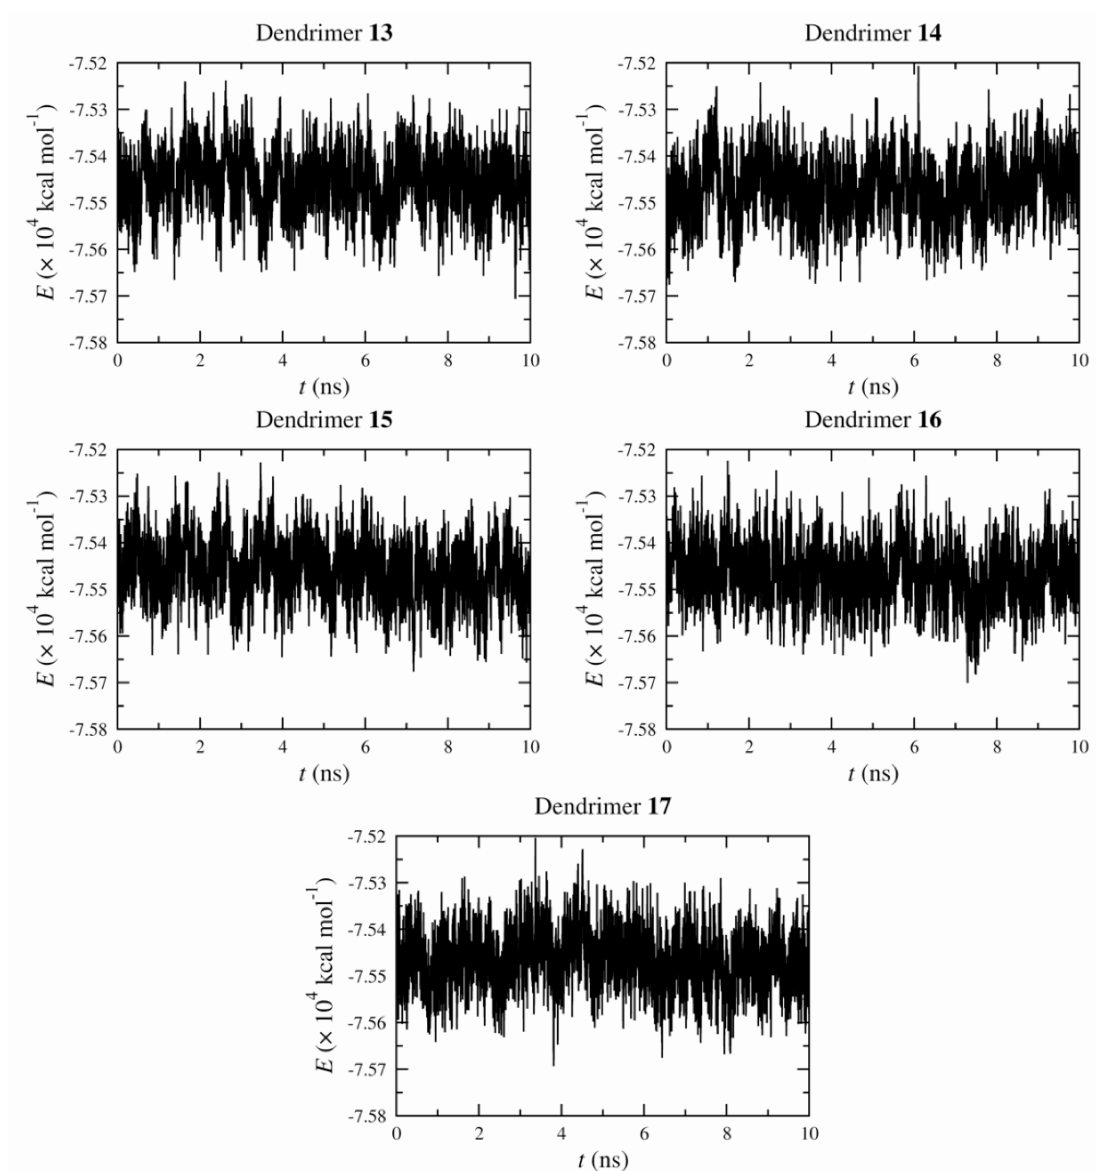

Figure S5: Instantaneous total simulation energies (NAMD TOTAL3) for the variegated SPAM dendrimers **13** – **17**, capped with ammonium and alcohol groups. **13** is variegated with pattern I, **14** with pattern II, and so on.

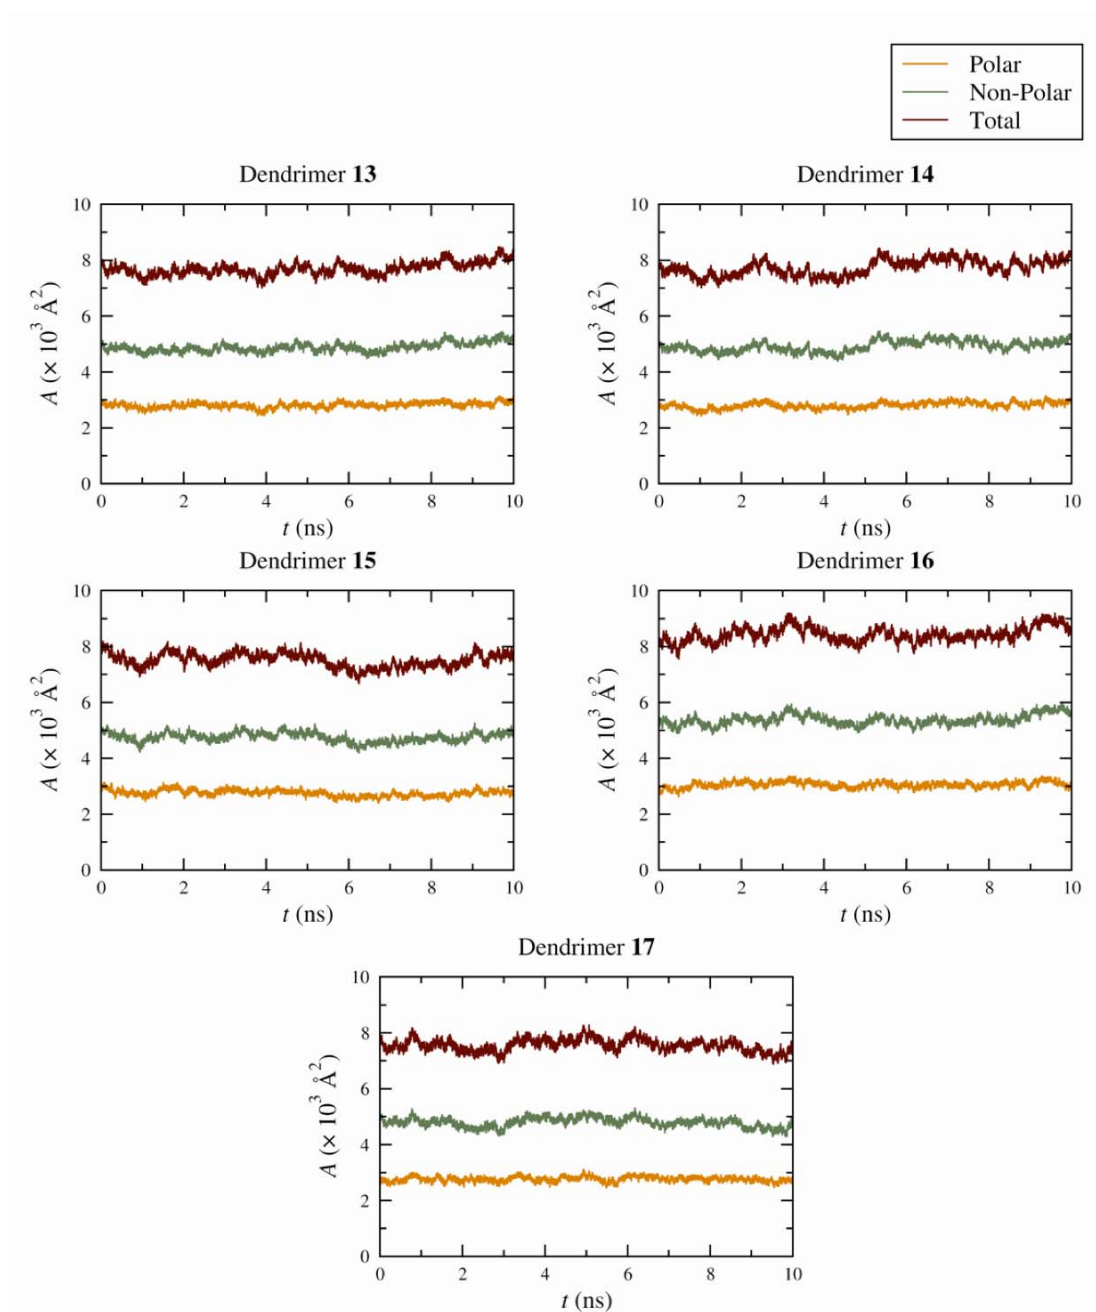

Figure S6: Instantaneous solvent-accessible surface areas for the variegated SPAM dendrimers **13** – **17**, capped with ammonium and alcohol groups. **13** is variegated with pattern I, **14** with pattern II, and so on. Surface areas for polar and non-polar atoms, and the total solvent-accessible surface area, are shown for each dendrimer. Polar surface areas are contributed by polar heavy atoms (i.e., nitrogen, oxygen); non-polar surface areas are contributed by carbon atoms.

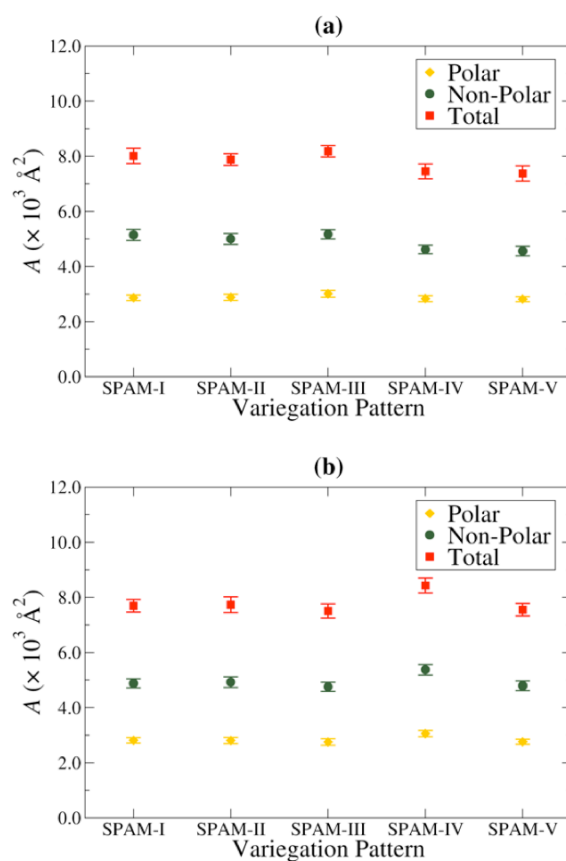

Figure S7: Polar, non-polar and total solvent-accessible surface areas of (a) the ammonium/carboxylate capped dendrimers **8 – 12**, and (b) the ammonium/alcohol capped dendrimers **13 – 17**. Polar surface areas are contributed by polar heavy atoms (i.e., nitrogen, oxygen); non-polar surface areas are contributed by carbon atoms.

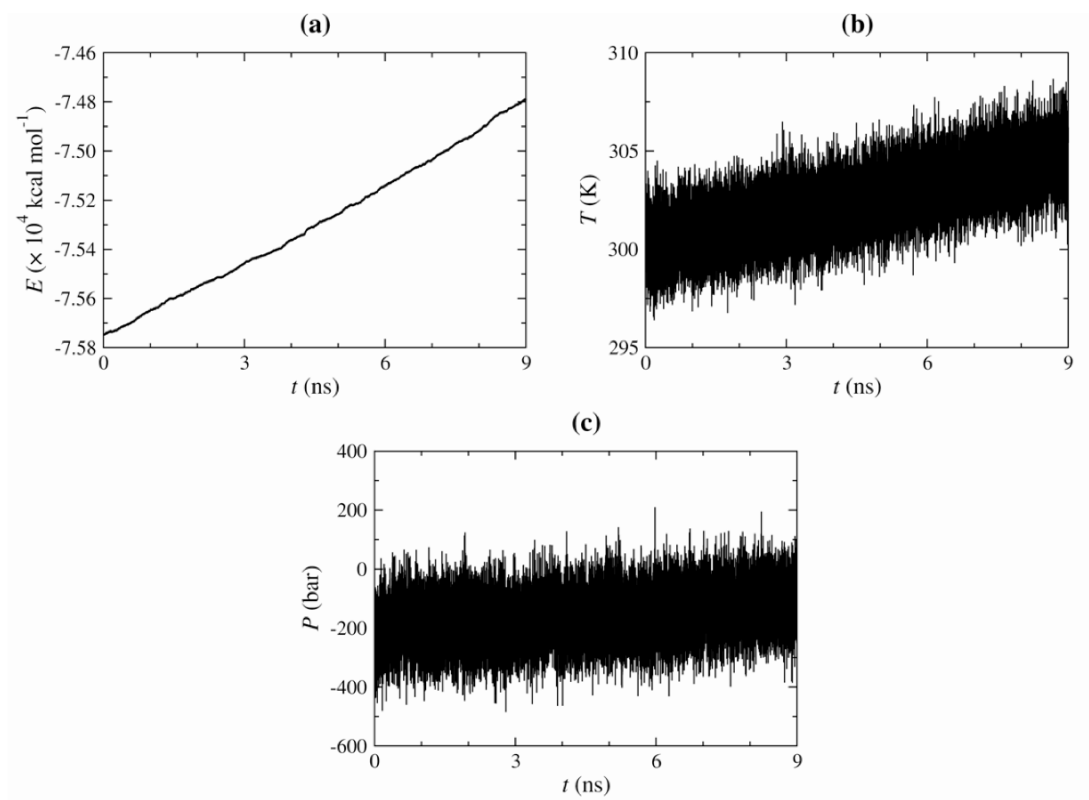

Figure S8: Behaviour of the protonated SPAM dendrimer (conformer 1) in an NVE ensemble over 9 ns.

(a) Total system energy. (b) System temperature. (c) System pressure. The system shows a modest increase in energy, temperature and pressure due to integration errors.



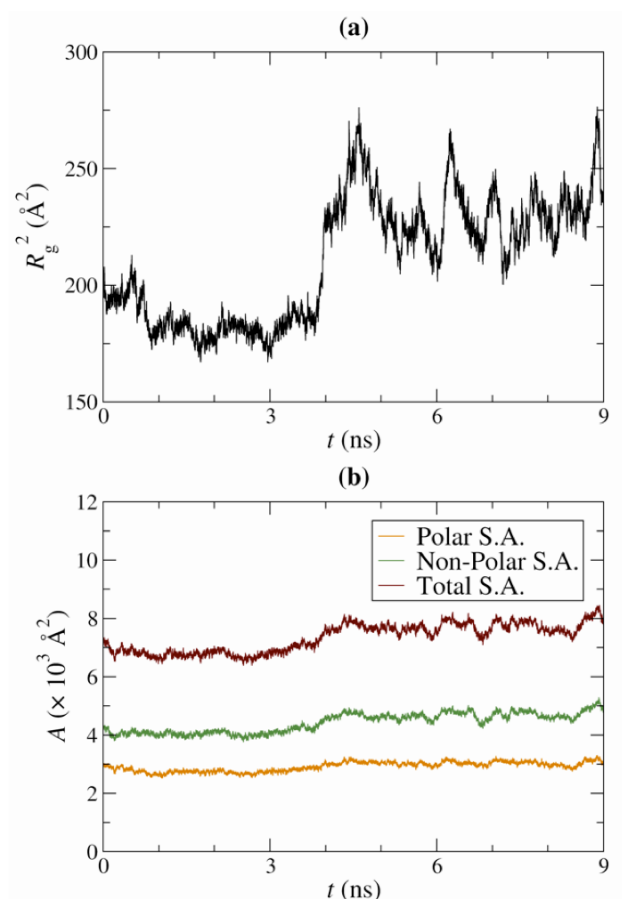

Figure S9: Properties of the protonated SPAM dendrimer (conformer 1) under an NVE ensemble. (a) The instantaneous mean-squared radius of gyration. (b) The solvent-accessible surface areas of polar (nitrogen, oxygen), non-polar (carbon) and all heavy atoms. During the course of this simulation, the dendrimer equilibrates and expands from a compressed starting geometry to give a mean-squared radius of gyration and surface areas that are in good agreement with the NPT simulations.

Table S1: Comparison of the mean-squared radius of gyration and mean asphericity of the protonated SPAM dendrimer (conformer 1) under the NPT and NVE ensembles. Values in brackets are standard deviations.

| Property                                                    | NPT ensemble  | NVE ensemble  |
|-------------------------------------------------------------|---------------|---------------|
| Mean-squared radius of gyration, $R_g^2$ ( $\text{\AA}^2$ ) | 218.6 (16.8)  | 211.0 (26.1)  |
| Asphericity, $\delta$                                       | 0.101 (0.040) | 0.077 (0.035) |
